# Supplementary material for: Examining the influence of gender, education, social class and birth cohort on MMSE tracking over time: a population-based prospective cohort study
Source: PubMed Central journal article supplement (PMC3542122; doi:10.1186/1471-2318-12-45), 2012-08-13

Appendix 1: Numbers of subjects in the analysis

| Wave             | Years<br>after<br>baseline | Interviews         | Alive but<br>not<br>approached | In analysis        | Dropout<br>since last<br>wave | Died since<br>last wave |
|------------------|----------------------------|--------------------|--------------------------------|--------------------|-------------------------------|-------------------------|
| (Sampling frame) |                            |                    |                                | 16,525             |                               |                         |
| 1                | 0                          | 13,004             |                                | 12,573             | 3,952                         | -                       |
| 2                | 2                          | 8,827              |                                | 8,468              | 2,841                         | 1 264                   |
| 3                | 5                          | 2,452 <sup>†</sup> | 3 941 <sup>*</sup>             | 2,221 <sup>†</sup> | 1,038                         | 1 268                   |
| 4                | 10                         | 3,145              |                                | 2,990 <sup>‡</sup> | 1,218                         | 1 972                   |

\* These are people who were interviewed at incidence screen at wave 2 and were not approached for interview until wave 4.

<sup>†</sup> Includes all individuals alive in the Cambridgeshire centre, i.e. 1085 interviews, and 1040 MMSE scores.

<sup>‡</sup> Includes 18 temporary refusers at wave 3

Appendix 2: Mean MMSE scores and 95% confidence intervals for the 1923-27 birth cohort split by age and covariates (sex, centre, education and social class)

|              |                | Age (years)       |                   |                   |                   |                   |                   |
|--------------|----------------|-------------------|-------------------|-------------------|-------------------|-------------------|-------------------|
|              |                | 65                | 70                | 75                | 80                | 85                | 90                |
| Sex          | Male           | 27.0 (26.7, 27.2) | 26.8 (26.5, 27.1) | 26.2 (25.6, 26.8) | 25.7 (25.0, 26.2) | 24.1 (22.7, 25.1) | 22.9 (21.4, 24.3) |
|              | Female         | 26.7 (26.3, 26.9) | 26.5 (26.2, 26.7) | 25.7 (25.2, 26.2) | 24.4 (23.5, 25.0) | 22.4 (20.9, 23.2) | 18.5 (16.7, 20.0) |
| Centre       | Cambridgeshire | 26.5 (26.1, 26.9) | 26.4 (25.8, 26.8) | 25.6 (24.9, 26.5) | 24.5 (23.5, 25.3) | 22.9 (21.5, 24.1) | 20.8 (19.1, 22.3) |
|              | Gwynedd        | 27.0 (26.5, 27.3) | 26.8 (26.4, 27.1) | 25.9 (25.1, 26.5) | 24.8 (24.0, 25.6) | 23.4 (21.9, 24.2) | 18.8 (16.5, 21.6) |
|              | Newcastle      | 26.8 (26.4, 27.2) | 26.7 (26.4, 27.1) | 26.2 (25.4, 26.9) | 25.3 (24.4, 26.0) | 23.0 (21.2, 24.1) | 19.7 (17.0, 22.1) |
|              | Nottingham     | 26.6 (25.8, 27.1) | 26.4 (25.7, 26.8) | 25.3 (24.1, 26.3) | 23.4 (21.3, 24.7) | 20.8 (17.7, 22.8) | 16.6 (13.0, 19.4) |
|              | Oxford         | 27.0 (26.7, 27.4) | 26.9 (26.6, 27.2) | 26.5 (25.0, 27.0) | 26.0 (25.2, 26.6) | 24.1 (22.3, 25.2) | 21.8 (19.0, 23.7) |
| Education    | < 9 years      | 26.4 (26.0, 26.6) | 26.3 (25.9, 26.4) | 25.4 (24.9, 25.9) | 24.1 (23.4, 24.7) | 22.1 (21.0, 23.0) | 18.4 (17.0, 20.1) |
|              | ≥10 years      | 27.7 (27.3, 27.8) | 27.5 (27.1, 27.6) | 26.7 (26.2, 27.2) | 25.9 (25.1, 26.4) | 23.8 (22.3, 24.8) | 21.0 (19.0, 22.9) |
| Social class | Manual         | 26.3 (26.0, 26.5) | 26.0 (25.8, 26.3) | 25.1 (24.6, 25.7) | 23.9 (23.0, 24.5) | 21.3 (19.8, 22.3) | 17.7 (15.7, 19.1) |
|              | Non-manual     | 27.7 (27.6, 27.9) | 27.6 (27.5, 27.8) | 27.1 (26.7, 27.4) | 26.1 (25.5, 26.6) | 24.7 (23.7, 25.4) | 21.3 (19.6, 22.6) |

Appendix 3: Mean MMSE (and 95% CI) by centre for the birth cohort 1923-27

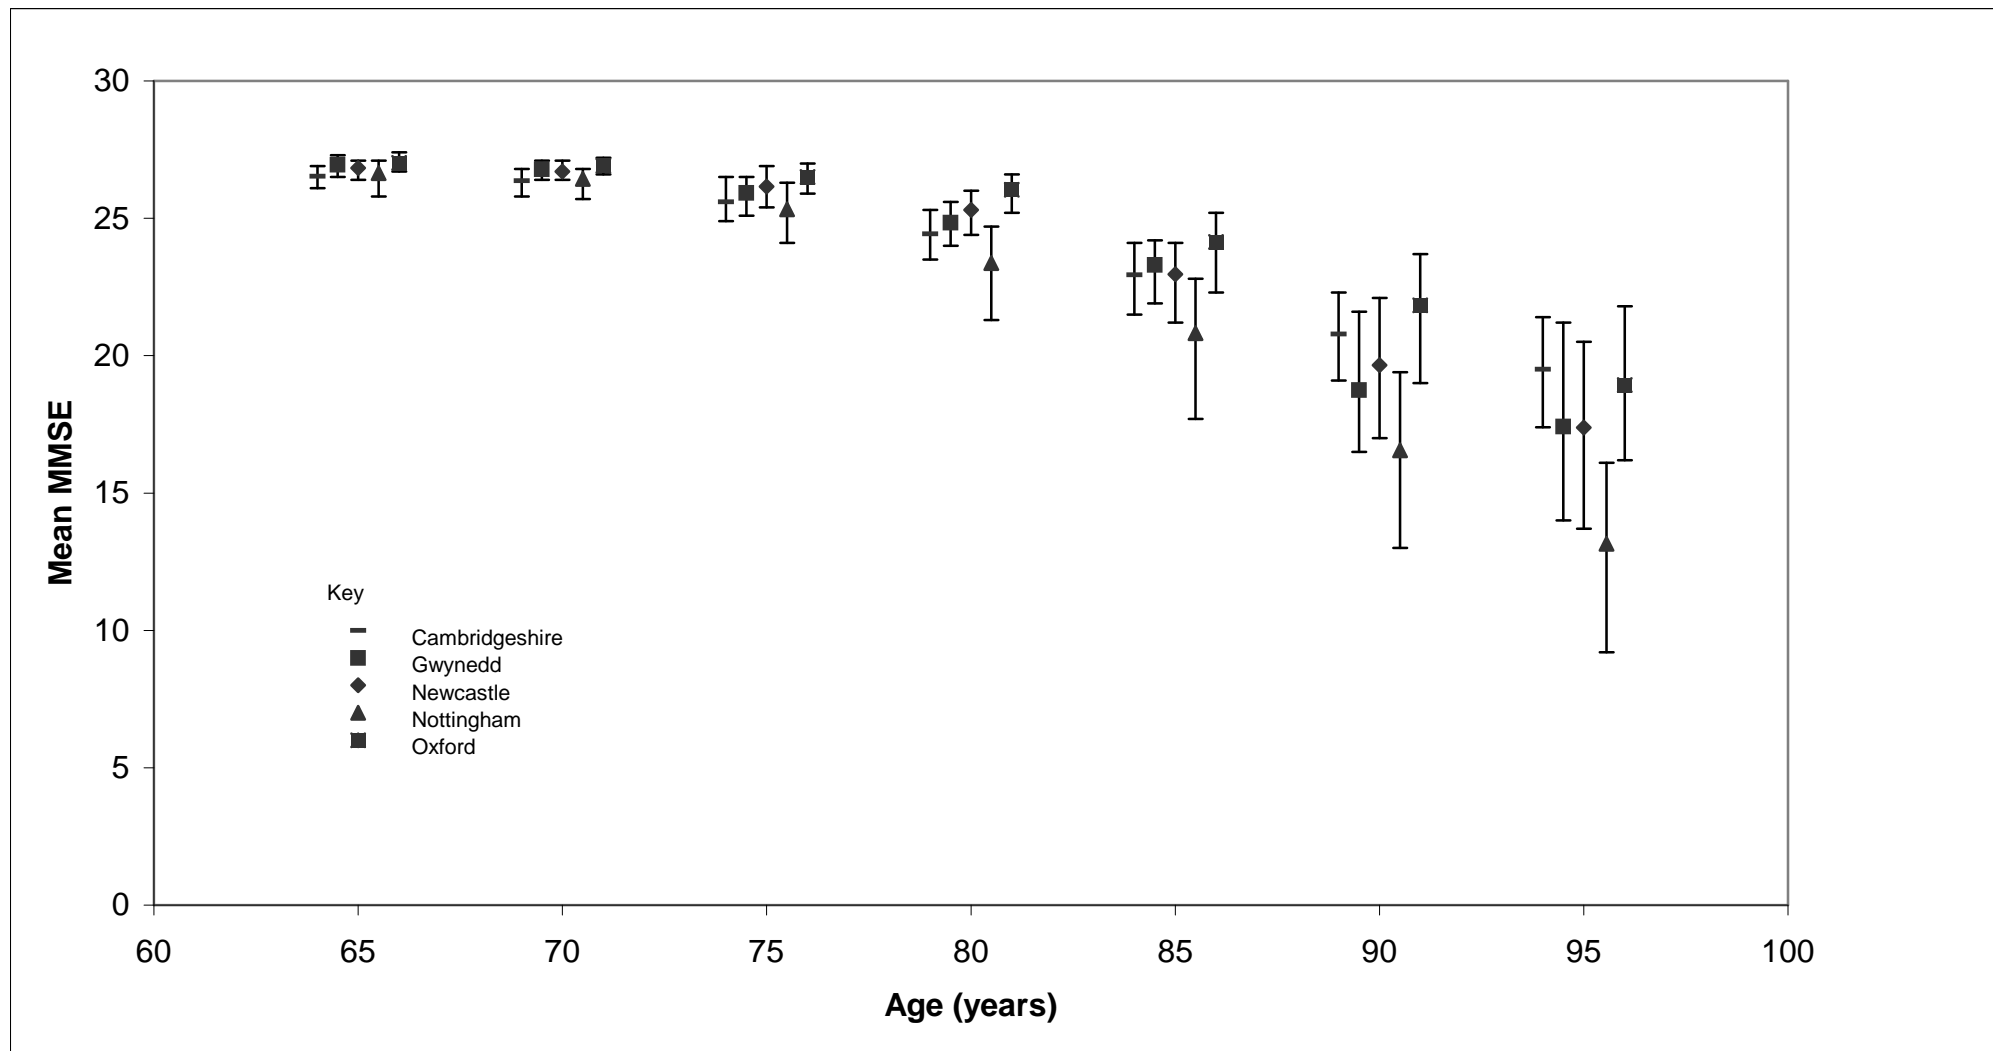

Supplement: 1471-2318-12-45-S1.pdf [file 1471-2318-12-45-S1.pdf]
